# Supplementary material
Source: PubMed Central journal article supplement (PMC10071375)
Supplement: jcsm.10422.sm001.pdf [file jcsm.10422.sm001.pdf]

**Table S1**—Month-by-month recruitment numbers.

| <b>Month</b> | <b>Year</b> | <b>SEC</b> | <b>PRI</b> |
|--------------|-------------|------------|------------|
| 9            | 2019        | 64         | 34         |
| 10           | 2019        | 26         | 3          |
| 11           | 2019        | 62         | 28         |
| 12           | 2019        | 42         | 63         |
| 1            | 2020        | 36         | 118        |
| 2            | 2020        | 0          | 1          |
| 3            | 2020        | 1          | 22         |
| 4            | 2020        | 6          | 11         |
| 5            | 2020        | 9          | 5          |
| 6            | 2020        | 14         | 8          |
| 7            | 2020        | 8          | 32         |
| 8            | 2020        | 3          | 35         |
| 9            | 2020        | 0          | 35         |
| 10           | 2020        | 0          | 26         |
| 11           | 2020        | 11         | 84         |
| 12           | 2020        | 42         | 104        |
| 1            | 2021        | 69         | 63         |
| 2            | 2021        | 7          | 31         |
| 3            | 2021        | 16         | 34         |
| 4            | 2021        | 18         | 12         |
| 5            | 2021        | 8          | 43         |
| 6            | 2021        | 2          | 1          |
| <b>Total</b> |             | <b>444</b> | <b>793</b> |

Figure S1—Missing data.

| Primary Group                     |                      |               |  |
|-----------------------------------|----------------------|---------------|--|
| Variable                          | Imputed Missing Data | Complete Data |  |
| Age                               | 0                    | 791           |  |
| Sex                               | 0                    | 791           |  |
| Seasonality                       | 0                    | 791           |  |
| Monthly Household Income          | 0                    | 791           |  |
| Household size                    | 0                    | 791           |  |
| Diagnostic Interview Schedule for | 11                   | 780           |  |
| Media Activity Form (MAF)         | 13                   | 778           |  |

  

| Secondary Group                     |                      |               |  |
|-------------------------------------|----------------------|---------------|--|
| Variable                            | Imputed Missing Data | Complete Data |  |
| Age                                 | 0                    | 442           |  |
| Sex                                 | 0                    | 442           |  |
| Seasonality                         | 0                    | 442           |  |
| Monthly Household Income            | 0                    | 442           |  |
| Household size                      | 0                    | 442           |  |
| Diagnostic Interview Schedule for t | 4                    | 438           |  |
| Media Activity Form (MAF)           | 15                   | 427           |  |

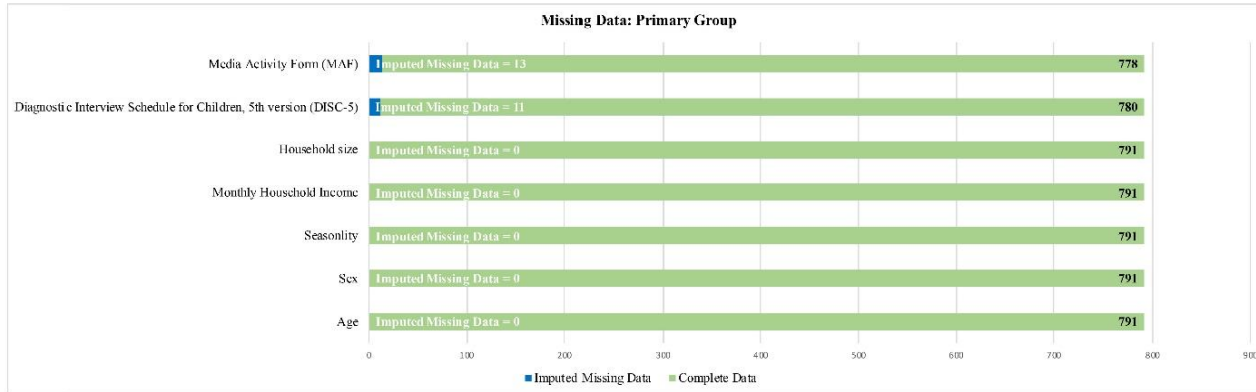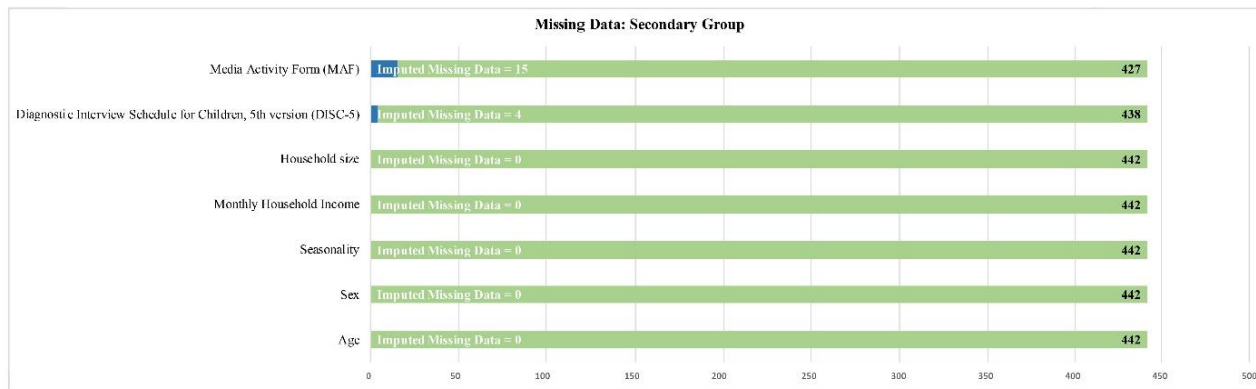

**Figure S2—Frequency of categories of mental disorders.**

| Category                                    | Disorders (n = 38) |                   |                    |            |            |           | Social Phobia | Separation Anxiety | Panic Disorder | Agoraphobia | GAD    | Selective Mutism | OCD       | PTSD      | DMDD       | MDD       | PDD        | Other Specified Depressive Disorder (RBD, SDDE,DEIS) |
|---------------------------------------------|--------------------|-------------------|--------------------|------------|------------|-----------|---------------|--------------------|----------------|-------------|--------|------------------|-----------|-----------|------------|-----------|------------|------------------------------------------------------|
|                                             | 0 DSM-5 Diagnosis  | 1 DSM-5 Diagnosis | >1 DSM-5 Diagnoses |            |            |           |               |                    |                |             |        |                  |           |           |            |           |            |                                                      |
| PRI (Pre-Covid n = 247)                     | 162 (65.59%)       | 40 (16.19%)       | 35 (14.17%)        | 9 (3.64%)  | 2 (0.81%)  | 0 (0%)    |               |                    | 1 (0.4%)       | 4 (1.62%)   | 0 (0%) | 4 (1.62%)        | 1 (0.4%)  | 0 (0%)    | 1 (0.4%)   | 0 (0%)    | 1 (0.4%)   |                                                      |
| PRI (During Covid n = 546)                  | 326 (59.71%)       | 118 (21.61%)      | 100 (18.32%)       | 37 (6.78%) | 13 (2.38%) | 1 (0.18%) |               |                    | 5 (0.92%)      | 13 (2.38%)  | 0 (0%) | 20 (3.66%)       | 0 (0%)    | 4 (0.73%) | 4 (0.73%)  | 1 (0.18%) | 12 (2.2%)  |                                                      |
| % difference (During Covid % - Pre-Covid %) | -5.88%             | +5.42%            | +4.15%             | +3.14%     | +1.57%     | +0.18%    |               |                    | +0.52%         | +0.76%      | /      | +2.04%           | -0.4%     | +0.73%    | +0.33%     | +0.18%    | +1.8%      |                                                      |
| Overall Primary                             | 61.54%             | 19.92%            | 17.02%             | 5.80%      | 1.89%      | 0.13%     |               |                    | 0.76%          | 2.14%       | 0.00%  | 3.03%            | 0.13%     | 0.50%     | 0.63%      | 0.13%     | 1.64%      |                                                      |
| SEC (Pre-Covid n = 231)                     | 152 (65.8%)        | 43 (18.61%)       | 33 (14.29%)        | 5 (2.16%)  | 3 (1.3%)   | 4 (1.73%) |               |                    | 1 (0.43%)      | 8 (2.46%)   | 0 (0%) | 13 (5.62%)       | 2 (0.87%) | 0 (0%)    | 2 (0.87%)  | 0 (0%)    | 16 (6.92%) |                                                      |
| SEC (During Covid n = 213)                  | 135 (63.38%)       | 36 (16.9%)        | 41 (19.25%)        | 11 (5.16%) | 4 (1.88%)  | 2 (0.94%) |               |                    | 2 (0.94%)      | 11 (5.16%)  | 0 (0%) | 16 (7.51%)       | 2 (0.94%) | 0 (0%)    | 10 (4.69%) | 0 (0%)    | 13 (6.1%)  |                                                      |
| % difference (During Covid % - Pre-Covid %) | -2.4%              | -1.71%            | +4.96%             | +3%        | +0.58%     | -0.79%    |               |                    | +0.51%         | +1.7%       | /      | +1.88%           | +0.07%    | /         | +3.82%     | /         | -0.83%     |                                                      |
| Overall Secondary                           | 64.64%             | 17.79%            | 16.89%             | 3.60%      | 1.58%      | 1.35%     |               |                    | 0.68%          | 4.28%       | 0.00%  | 6.53%            | 0.90%     | 0.00%     | 2.70%      | 0.00%     | 6.53%      |                                                      |
| PRI (Pre-Covid): Missing Data               | 0 (0%)             | 0 (0%)            | 0 (0%)             | 0 (0%)     | 0 (0%)     | 0 (0%)    |               |                    | 0 (0%)         | 0 (0%)      | 0 (0%) | 0 (0%)           | 0 (0%)    | 0 (0%)    | 0 (0%)     | 0 (0%)    | 0 (0%)     |                                                      |
| PRI (During Covid): Missing Data            | 0 (0%)             | 0 (0%)            | 0 (0%)             | 0 (0%)     | 0 (0%)     | 0 (0%)    |               |                    | 0 (0%)         | 0 (0%)      | 0 (0%) | 0 (0%)           | 0 (0%)    | 0 (0%)    | 0 (0%)     | 0 (0%)    | 0 (0%)     |                                                      |
| SEC (Pre-Covid): Missing Data               | 3 (1.3%)           | 3 (1.3%)          | 3 (1.3%)           | 0 (0%)     | 0 (0%)     | 0 (0%)    |               |                    | 0 (0%)         | 0 (0%)      | 0 (0%) | 0 (0%)           | 0 (0%)    | 0 (0%)    | 0 (0%)     | 0 (0%)    | 0 (0%)     |                                                      |
| SEC (During Covid): Missing Data            | 1 (0.47%)          | 1 (0.47%)         | 1 (0.47%)          | 0 (0%)     | 0 (0%)     | 0 (0%)    |               |                    | 0 (0%)         | 0 (0%)      | 0 (0%) | 0 (0%)           | 0 (0%)    | 0 (0%)    | 0 (0%)     | 0 (0%)    | 0 (0%)     |                                                      |

  

| Category  | Disorders (n = 38)       |                         |             |           |           |         |           |         | Specific Phobia | Trichotillomania | Excoriation | Pica      | ARFID     | Anorexia Nervosa | Bulimia Nervosa | Binge-Eating Disorder | Enuresis (Diurnal/ Nocturnal/ Both) |
|-----------|--------------------------|-------------------------|-------------|-----------|-----------|---------|-----------|---------|-----------------|------------------|-------------|-----------|-----------|------------------|-----------------|-----------------------|-------------------------------------|
|           | Non-Suicidal Self-Injury | ADHD (IA/ HI/ Combined) | IED         | ODD       | CD        | Alcohol | Marij     | Tobacco |                 |                  |             |           |           |                  |                 |                       |                                     |
| 1 (0.4%)  | 33 (13.36%)              | 21 (8.5%)               | 30 (12.15%) | 0 (0%)    | 0 (0%)    | 0 (0%)  | 0 (0%)    | 0 (0%)  | 0 (0%)          | 13 (5.26%)       | 0 (0%)      | 2 (0.81%) | 0 (0%)    | 7 (2.83%)        | 0 (0%)          | 0 (0%)                | 3 (1.21%)                           |
| 4 (0.73%) | 86 (15.75%)              | 37 (6.78%)              | 72 (13.19%) | 4 (0.73%) | 0 (0%)    | 0 (0%)  | 0 (0%)    | 0 (0%)  | 0 (0%)          | 37 (6.78%)       | 3 (0.55%)   | 8 (1.47%) | 0 (0%)    | 23 (4.21%)       | 1 (0.18%)       | 0 (0%)                | 18 (3.3%)                           |
| +0.33%    | +2.39%                   | -1.22%                  | +1.64%      | +0.73%    | /         | /       | /         | /       | /               | +1.52%           | +0.55%      | +0.66%    | /         | +1.38%           | +0.18%          | /                     | +2.09%                              |
| 0.83%     | 15.01%                   | 7.31%                   | 12.86%      | 0.50%     | 0.00%     | 0.00%   | 0.00%     | 0.00%   | 0.00%           | 6.31%            | 0.38%       | 1.36%     | 0.00%     | 3.78%            | 0.13%           | 0.00%                 | 2.85%                               |
| 2 (0.87%) | 8 (3.46%)                | 5 (2.16%)               | 9 (3.9%)    | 2 (0.87%) | 1 (0.43%) | 0 (0%)  | 1 (0.43%) | 0 (0%)  | 0 (0%)          | 16 (6.93%)       | 0 (0%)      | 4 (1.73%) | 5 (2.16%) | 10 (4.33%)       | 1 (0.43%)       | 0 (0%)                | 0 (0%)                              |
| 3 (1.41%) | 19 (8.92%)               | 10 (4.69%)              | 29 (13.62%) | 2 (0.94%) | 3 (1.41%) | 0 (0%)  | 3 (1.41%) | 0 (0%)  | 0 (0%)          | 11 (5.16%)       | 0 (0%)      | 2 (0.94%) | 0 (0%)    | 15 (7.04%)       | 3 (1.41%)       | 0 (0%)                | 0 (0%)                              |
| +0.54%    | +5.46%                   | +2.53%                  | +9.72%      | +0.07%    | +0.98%    | /       | +0.98%    | /       | /               | -1.77%           | /           | -0.79%    | -2.18%    | +2.21%           | +0.98%          | /                     | /                                   |
| 1.13%     | 6.08%                    | 3.38%                   | 8.56%       | 0.90%     | 0.90%     | 0.00%   | 0.90%     | 0.00%   | 0.00%           | 6.98%            | 0.00%       | 1.35%     | 1.13%     | 5.63%            | 0.91%           | 0.00%                 | 0.00%                               |
| 0 (0%)    | 0 (0%)                   | 0 (0%)                  | 0 (0%)      | 0 (0%)    | 0 (0%)    | 0 (0%)  | 0 (0%)    | 0 (0%)  | 0 (0%)          | 0 (0%)           | 0 (0%)      | 0 (0%)    | 0 (0%)    | 0 (0%)           | 0 (0%)          | 0 (0%)                | 0 (0%)                              |
| 0 (0%)    | 0 (0%)                   | 0 (0%)                  | 0 (0%)      | 0 (0%)    | 0 (0%)    | 0 (0%)  | 0 (0%)    | 0 (0%)  | 0 (0%)          | 0 (0%)           | 0 (0%)      | 0 (0%)    | 0 (0%)    | 0 (0%)           | 0 (0%)          | 0 (0%)                | 0 (0%)                              |
| 0 (0%)    | 0 (0%)                   | 0 (0%)                  | 0 (0%)      | 0 (0%)    | 0 (0%)    | 0 (0%)  | 0 (0%)    | 0 (0%)  | 0 (0%)          | 0 (0%)           | 0 (0%)      | 0 (0%)    | 0 (0%)    | 0 (0%)           | 0 (0%)          | 0 (0%)                | 0 (0%)                              |
| 0 (0%)    | 0 (0%)                   | 0 (0%)                  | 0 (0%)      | 0 (0%)    | 0 (0%)    | 0 (0%)  | 0 (0%)    | 0 (0%)  | 0 (0%)          | 0 (0%)           | 0 (0%)      | 0 (0%)    | 0 (0%)    | 0 (0%)           | 0 (0%)          | 0 (0%)                | 0 (0%)                              |

  

| Encopresis | Tourette's Disorder | Persistent (Chronic) Motor or Vocal Tic Disorder | Provisional Tic Disorder | Unspecified Type | Bipolar I Disorder | Bipolar II Disorder | Schizophrenia | DSM-5 Diagnosis (N = 38*)   |                       |                   |                |                                |                     |           |             |                     |                     |                      |                                                          |                              |           |                      |                     |                           |                                         |                |                         |                                                      |                              |                      |                        |                         |                   |        |        |        |
|------------|---------------------|--------------------------------------------------|--------------------------|------------------|--------------------|---------------------|---------------|-----------------------------|-----------------------|-------------------|----------------|--------------------------------|---------------------|-----------|-------------|---------------------|---------------------|----------------------|----------------------------------------------------------|------------------------------|-----------|----------------------|---------------------|---------------------------|-----------------------------------------|----------------|-------------------------|------------------------------------------------------|------------------------------|----------------------|------------------------|-------------------------|-------------------|--------|--------|--------|
|            |                     |                                                  |                          |                  |                    |                     |               | 1. Social Phobia            | 2. Separation Anxiety | 3. Panic Disorder | 4. Agoraphobia | 5. GAD                         | 6. Selective Mutism | 7. OCD    | 8. PTSD     | 9. DMDD             | 10. MDD             | 11. PDD              | 12. Other Specified Depressive Disorder (RBD, SDDE,DEIS) | 13. Non-Suicidal Self-Injury |           |                      |                     |                           |                                         |                |                         |                                                      |                              |                      |                        |                         |                   |        |        |        |
| 0 (0%)     | 5 (2.02%)           | 8 (3.24%)                                        | 8 (3.24%)                | 1 (0.4%)         | 1 (0.4%)           | 0 (0%)              | 0 (0%)        | 14. ADHD (IA/ HI/ Combined) | 15. IED               | 16. ODD           | 17. CD         | 18. Substance-Related Disorder | 19. Alcohol         | 20. Marij | 21. Tobacco | 22. Other Substance | 23. Specific Phobia | 24. Trichotillomania | 25. Excoriation                                          | 26. Pica                     | 27. ARFID | 28. Anorexia Nervosa | 29. Bulimia Nervosa | 30. Binge-Eating Disorder | 31. Enuresis (Diurnal/ Nocturnal/ Both) | 32. Encopresis | 33. Tourette's Disorder | 34. Persistent (Chronic) Motor or Vocal Tic Disorder | 35. Provisional Tic Disorder | 36. Unspecified Type | 37. Bipolar I Disorder | 38. Bipolar II Disorder | 39. Schizophrenia |        |        |        |
| 0 (0%)     | 10 (1.83%)          | 35 (6.41%)                                       | 10 (1.83%)               | 3 (0.55%)        | 2 (0.37%)          | 0 (0%)              | 0 (0%)        | 0 (0%)                      | 0 (0%)                | 0 (0%)            | 0 (0%)         | 0 (0%)                         | 0 (0%)              | 0 (0%)    | 0 (0%)      | 0 (0%)              | 0 (0%)              | 0 (0%)               | 0 (0%)                                                   | 0 (0%)                       | 0 (0%)    | 0 (0%)               | 0 (0%)              | 0 (0%)                    | 0 (0%)                                  | 0 (0%)         | 0 (0%)                  | 0 (0%)                                               | 0 (0%)                       | 0 (0%)               | 0 (0%)                 | 0 (0%)                  | 0 (0%)            | 0 (0%) | 0 (0%) | 0 (0%) |
| /          | -0.19%              | +3.17%                                           | -1.41%                   | +0.15%           | -0.03%             | /                   | /             | 0 (0%)                      | 0 (0%)                | 0 (0%)            | 0 (0%)         | 0 (0%)                         | 0 (0%)              | 0 (0%)    | 0 (0%)      | 0 (0%)              | 0 (0%)              | 0 (0%)               | 0 (0%)                                                   | 0 (0%)                       | 0 (0%)    | 0 (0%)               | 0 (0%)              | 0 (0%)                    | 0 (0%)                                  | 0 (0%)         | 0 (0%)                  | 0 (0%)                                               | 0 (0%)                       | 0 (0%)               | 0 (0%)                 | 0 (0%)                  | 0 (0%)            | 0 (0%) | 0 (0%) | 0 (0%) |
| 0.00%      | 1.89%               | 5.42%                                            | 2.27%                    | 0.50%            | 0.38%              | 0.00%               | 0.00%         | 0.00%                       | 0.00%                 | 0.00%             | 0.00%          | 0.00%                          | 0.00%               | 0.00%     | 0.00%       | 0.00%               | 0.00%               | 0.00%                | 0.00%                                                    | 0.00%                        | 0.00%     | 0.00%                | 0.00%               | 0.00%                     | 0.00%                                   | 0.00%          | 0.00%                   | 0.00%                                                | 0.00%                        | 0.00%                | 0.00%                  | 0.00%                   | 0.00%             | 0.00%  | 0.00%  | 0.00%  |
| 0 (0%)     | 2 (0.87%)           | 12 (5.19%)                                       | 2 (0.87%)                | 2 (0.87%)        | 0 (0%)             | 1 (0.43%)           | 0 (0%)        | 0 (0%)                      | 0 (0%)                | 0 (0%)            | 0 (0%)         | 0 (0%)                         | 0 (0%)              | 0 (0%)    | 0 (0%)      | 0 (0%)              | 0 (0%)              | 0 (0%)               | 0 (0%)                                                   | 0 (0%)                       | 0 (0%)    | 0 (0%)               | 0 (0%)              | 0 (0%)                    | 0 (0%)                                  | 0 (0%)         | 0 (0%)                  | 0 (0%)                                               | 0 (0%)                       | 0 (0%)               | 0 (0%)                 | 0 (0%)                  | 0 (0%)            | 0 (0%) | 0 (0%) | 0 (0%) |
| 0 (0%)     | 2 (0.94%)           | 10 (4.69%)                                       | 2 (0.94%)                | 1 (0.47%)        | 0 (0%)             | 1 (0.47%)           | 0 (0%)        | 0 (0%)                      | 0 (0%)                | 0 (0%)            | 0 (0%)         | 0 (0%)                         | 0 (0%)              | 0 (0%)    | 0 (0%)      | 0 (0%)              | 0 (0%)              | 0 (0%)               | 0 (0%)                                                   | 0 (0%)                       | 0 (0%)    | 0 (0%)               | 0 (0%)              | 0 (0%)                    | 0 (0%)                                  | 0 (0%)         | 0 (0%)                  | 0 (0%)                                               | 0 (0%)                       | 0 (0%)               | 0 (0%)                 | 0 (0%)                  | 0 (0%)            | 0 (0%) | 0 (0%) | 0 (0%) |
| /          | +0.07%              | -0.50%                                           | +0.07%                   | -0.4%            | /                  | +0.04%              | /             | 0 (0%)                      | 0 (0%)                | 0 (0%)            | 0 (0%)         | 0 (0%)                         | 0 (0%)              | 0 (0%)    | 0 (0%)      | 0 (0%)              | 0 (0%)              | 0 (0%)               | 0 (0%)                                                   | 0 (0%)                       | 0 (0%)    | 0 (0%)               | 0 (0%)              | 0 (0%)                    | 0 (0%)                                  | 0 (0%)         | 0 (0%)                  | 0 (0%)                                               | 0 (0%)                       | 0 (0%)               | 0 (0%)                 | 0 (0%)                  | 0 (0%)            | 0 (0%) | 0 (0%) | 0 (0%) |
| 0.00%      | 0.90%               | 4.95%                                            | 0.90%                    | 0.68%            | 0.00%              | 0.45%               | 0.00%         | 0.00%                       | 0.00%                 | 0.00%             | 0.00%          | 0.00%                          | 0.00%               | 0.00%     | 0.00%       | 0.00%               | 0.00%               | 0.00%                | 0.00%                                                    | 0.00%                        | 0.00%     | 0.00%                | 0.00%               | 0.00%                     | 0.00%                                   | 0.00%          | 0.00%                   | 0.00%                                                | 0.00%                        | 0.00%                | 0.00%                  | 0.00%                   | 0.00%             | 0.00%  | 0.00%  | 0.00%  |
| 0 (0%)     | 0 (0%)              | 0 (0%)                                           | 0 (0%)                   | 0 (0%)           | 0 (0%)             | 0 (0%)              | 0 (0%)        | 0 (0%)                      | 0 (0%)                | 0 (0%)            | 0 (0%)         | 0 (0%)                         | 0 (0%)              | 0 (0%)    | 0 (0%)      | 0 (0%)              | 0 (0%)              | 0 (0%)               | 0 (0%)                                                   | 0 (0%)                       | 0 (0%)    | 0 (0%)               | 0 (0%)              | 0 (0%)                    | 0 (0%)                                  | 0 (0%)         | 0 (0%)                  | 0 (0%)                                               | 0 (0%)                       | 0 (0%)               | 0 (0%)                 | 0 (0%)                  | 0 (0%)            | 0 (0%) | 0 (0%) | 0 (0%) |
| 0 (0%)     | 0 (0%)              | 0 (0%)                                           | 0 (0%)                   | 0 (0%)           | 0 (0%)             | 0 (0%)              | 0 (0%)        | 0 (0%)                      | 0 (0%)                | 0 (0%)            | 0 (0%)         | 0 (0%)                         | 0 (0%)              | 0 (0%)    | 0 (0%)      | 0 (0%)              | 0 (0%)              | 0 (0%)               | 0 (0%)                                                   | 0 (0%)                       | 0 (0%)    | 0 (0%)               | 0 (0%)              | 0 (0%)                    | 0 (0%)                                  | 0 (0%)         | 0 (0%)                  | 0 (0%)                                               | 0 (0%)                       | 0 (0%)               | 0 (0%)                 | 0 (0%)                  | 0 (0%)            | 0 (0%) | 0 (0%) | 0 (0%) |
| 0 (0%)     | 0 (0%)              | 0 (0%)                                           | 0 (0%)                   | 0 (0%)           | 0 (0%)             | 0 (0%)              | 0 (0%)        | 0 (0%)                      | 0 (0%)                | 0 (0%)            | 0 (0%)         | 0 (0%)                         | 0 (0%)              | 0 (0%)    | 0 (0%)      | 0 (0%)              | 0 (0%)              | 0 (0%)               | 0 (0%)                                                   | 0 (0%)                       | 0 (0%)    | 0 (0%)               | 0 (0%)              | 0 (0%)                    | 0 (0%)                                  | 0 (0%)         | 0 (0%)                  | 0 (0%)                                               | 0 (0%)                       | 0 (0%)               | 0 (0%)                 | 0 (0%)                  | 0 (0%)            | 0 (0%) | 0 (0%) | 0 (0%) |

\* Total Number of DSM-5 Disorder is 38 as 18. Substance-Related Disorder was created for covering 19. Alcohol, 20. Marij, 21. Tobacco, and 22. Other Substance.
